# Supplementary material for: Chronic fatigue associated with post-COVID syndrome versus transient fatigue caused by high intensity exercise: are they comparable in terms of vascular effects?
Source: bioRxiv or medRxiv preprint supplement (doi:10.1101/2022.02.03.22270294), 2022-02-04
Supplement: Supplementary file [file media-1.pdf]

## Supplementary Material

**Table 1.** Characteristics of the control and post-COVID groups by sex.

| Characteristics                            | Control<br>(30-50 y.) |                | Post-COVID<br>(30-50 y.) |                |
|--------------------------------------------|-----------------------|----------------|--------------------------|----------------|
|                                            | Female<br>n = 13      | Male<br>n = 19 | Female<br>n = 26         | Male<br>n = 19 |
| Age [years]                                | 39.0 ± 6.6            | 36.9 ± 5.5     | 41.2 ± 4.5               | 42.0 ± 6.0     |
| Body mass index (BMI) [kg/m <sup>2</sup> ] | 23.8 ± 3.0            | 25.6 ± 3.3     | 25.1 ± 5.4               | 28.3 ± 3.2     |
| SBP                                        | 116.6 ± 12.3          | 130.0 ± 9.8    | 127.4 ± 14.3             | 137.0 ± 11.9   |
| DBP                                        | 76.1 ± 7.9            | 81.7 ± 8.0     | 77.1 ± 10.0              | 83.1 ± 9.1     |
| Cigarette smoking                          | 1 (7.7)               | 1 (5.2)        | 2 (7.7)                  | 4 (21.1)       |
| Duration of post-COVID symptoms [weeks]    | –                     | –              | 15.7 ± 8.1               | 16.5 ± 11.8    |
| Sum of post-COVID symptoms                 | –                     | –              | 7.2 ± 3.2                | 6.0 ± 2.8      |
| RHR [%]                                    | 35.5 ± 6.6            | 31.9 ± 5.6     | 27.9 ± 7.6               | 27.3 ± 10.0    |
| HR <sub>max</sub> [%]                      | 21.1 ± 4.4            | 18.5 ± 3.0     | 18.2 ± 4.3               | 19.0 ± 4.3     |
| NOI [%]                                    | 72.8 ± 23.8           | 73.6 ± 17.4    | 47.8 ± 20.5              | 56.7 ± 22.1    |
| FM                                         | 141.4 ± 104.1         | 51.8 ± 26.8    | 85.2 ± 83.1              | 45.7 ± 36.6    |
| log(HS)                                    | 1.9 ± 0.4             | 1.6 ± 0.4      | 1.8 ± 0.3                | 1.6 ± 0.4      |

Continuous variables, mean ± SD; dichotomous variables, no. (%)

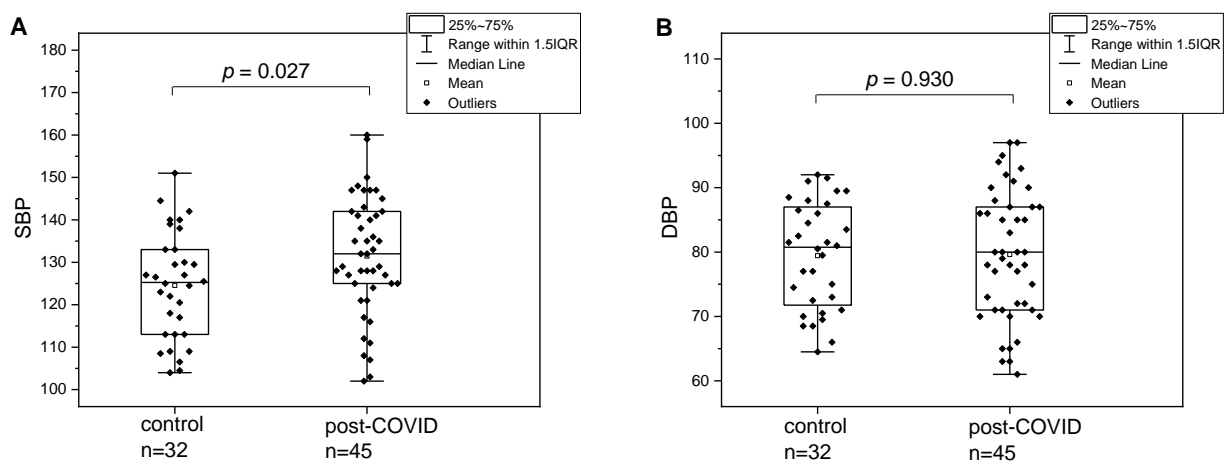

**Figure 1.** Comparison of systolic (A) and diastolic (B) blood pressure for the control group and post-COVID group. Statistical significance was set at  $p < 0.05$ . The  $p$ -values were calculated from the results of a two-sample t-test.

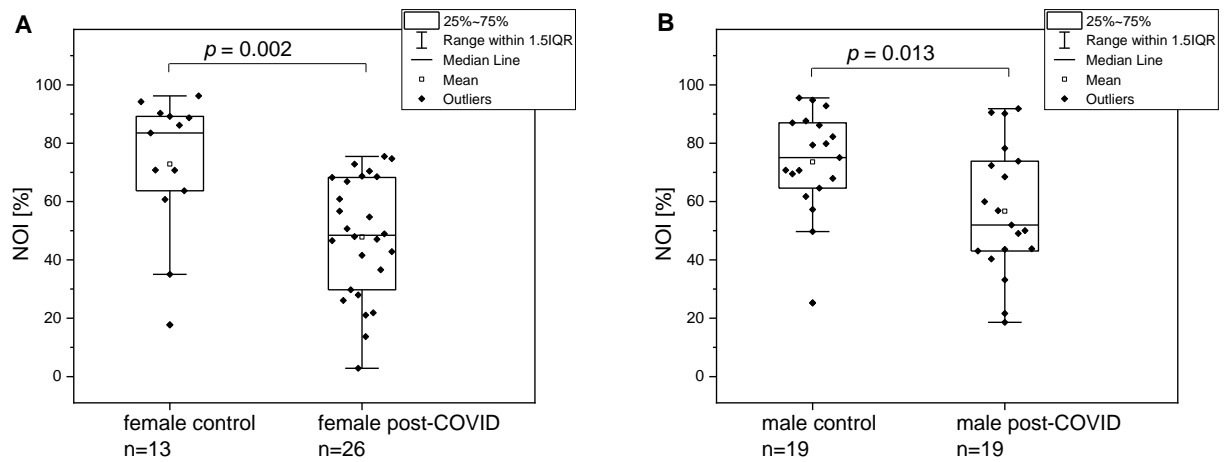

**Figure 2.** Comparison of the NOI parameter for the control group and post-COVID group by sex (A – female, B – male). Statistical significance was set at  $p < 0.05$ . The  $p$ -values were calculated from the results of a Mann-Whitney test for comparison A and the two-sample t-test for comparison B.

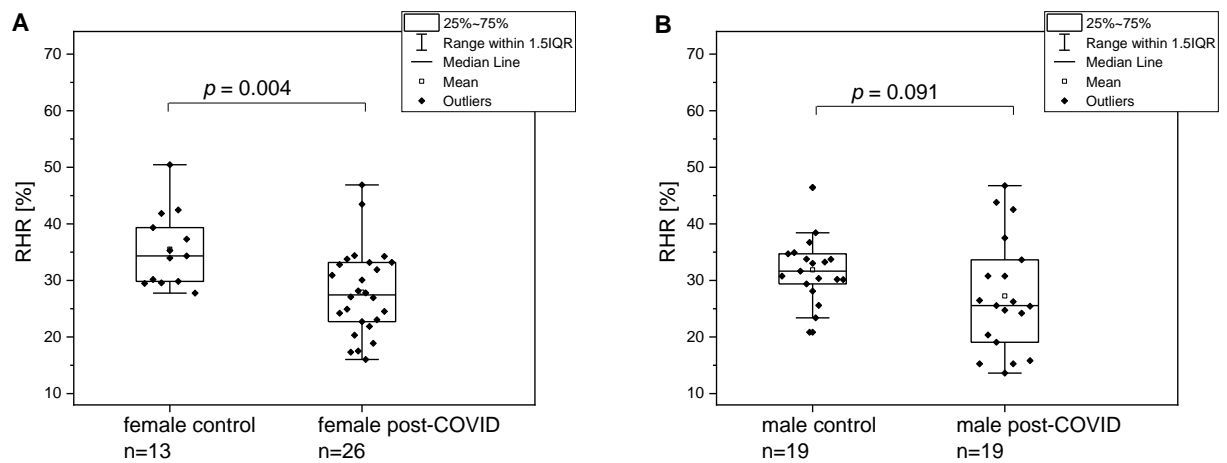

**Figure 3.** Comparison of the RHR parameter for the control group and post-COVID group by sex (A – female, B – male). Statistical significance was set at  $p < 0.05$ . The  $p$ -values were calculated from the results of a two-sample t-test.
